# Supplementary material for: A model of COVID-19 pandemic with vaccines and mutant viruses
Source: PubMed Central journal article supplement (PMC9591069; doi:10.1371/journal.pone.0275851), 2022-10-24
Supplement: pone.0275851.s003.pdf [file pone.0275851.s003.pdf]

# Proof of Proposition 1.

**Proposition 1.** *If  $D^0$  is the DFE state of the SEIHR model (2), then  $D^0$  is locally asymptotically stable if  $R_0 = \rho(G) \leq 1$ , but unstable if  $R_0 > 1$ .*

*Proof.* The proof of this proposition proceeds similarly to the derivation of the basic reproduction number of the SEIR model of the study [44]. Since  $X = (S, E, I, H_1, H_2, H_3, R_1, R_2, R_3) = D^0$ , we can assume that the susceptible group  $S$  is almost similar to the total population  $N$ , i.e.,  $S \approx N$ . Therefore we can obtain the linear equations for  $E(t)$  and  $I(t)$ :

$$\begin{aligned} E'(t) &= \beta I(t) - \sigma E(t) \\ I'(t) &= \sigma E(t) - \mu I(t). \end{aligned} \tag{1}$$

In order to easily handle the derivative term, we use the Laplace transforms of  $E(t)$  and  $I(t)$ :

$$\begin{aligned} \tilde{E}(\lambda) &= \int_0^{\infty} E(t)e^{-\lambda t} dt \\ \tilde{I}(\lambda) &= \int_0^{\infty} I(t)e^{-\lambda t} dt \end{aligned} \tag{2}$$

with  $\text{Re}(\lambda) > 0$ . Now, we apply the Laplace transforms on both sides of (1), then

$$\begin{aligned} \mathcal{L}(E'(t)) &= \int_0^{\infty} E'(t)e^{-\lambda t} dt \\ &= [E(t)e^{-\lambda t}]_{t=0}^{t=\infty} + \lambda \int_0^{\infty} E(t)e^{-\lambda t} dt \\ &= -E(0) + \lambda \tilde{E}(\lambda) = \beta \tilde{I}(\lambda) - \sigma \tilde{E}(\lambda), \end{aligned} \tag{3}$$

and similarly, we can calculate the Laplace transform of  $I'(t)$ :

$$\mathcal{L}(I'(t)) = -I(0) + \lambda \tilde{I}(\lambda) = \sigma \tilde{E}(\lambda) - \mu \tilde{I}(\lambda). \tag{4}$$

where  $E(0)$  and  $I(0)$  are the initial conditions for  $E(t)$  and  $I(t)$ , respectively. By the equations (3) and (4), we obtain a linear system,

$$\begin{pmatrix} -\sigma - \lambda & \beta \\ \sigma & -\mu - \lambda \end{pmatrix} \begin{pmatrix} \tilde{E}(\lambda) \\ \tilde{I}(\lambda) \end{pmatrix} = \begin{pmatrix} E(0) \\ I(0) \end{pmatrix}. \tag{5}$$

The eigenvalues  $\lambda$  are the determinant of the matrix,

$$\begin{vmatrix} -\sigma - \lambda & \beta \\ \sigma & -\mu - \lambda \end{vmatrix} = 0. \tag{6}$$

It implies that

$$\begin{aligned} \lambda^2 + (\sigma + \mu)\lambda + \sigma(\mu - \beta) &= 0 \\ \implies \lambda_{\pm} &= \frac{-(\sigma + \mu)}{2} \pm \frac{\sqrt{(\sigma - \mu)^2 + 4\sigma\beta}}{2}. \end{aligned} \tag{7}$$

Since  $\sigma, \beta > 0$ , then  $(\sigma - \mu)^2 + 4\sigma\beta$  has always positive sign, that is, the eigenvalues are real.

1. If  $R_0 = \beta/\mu < 1$ , then both  $\lambda_+ < 0$  and  $\lambda_- < 0$ . Therefore the solution decays exponentially.
2. If  $R_0 = \beta/\mu > 1$ , then  $\lambda_+ > 0$  and  $\lambda_- < 0$ . So the solution grows exponentially.
3. If  $R_0 = \beta/\mu = 1$ , then  $\lambda_+ = 0$  and  $\lambda_- = -(\sigma + \mu)$ . The solution remains constant.

□
